# Supplementary material
Source: HighWire-hosted journal article supplement (https://bjsm.bmj.com/content/bjsports-2017-098417)
Supplement: inline-supplementary-material-1 [file inline-supplementary-material-1.docx]

# Supplementary data

### Supplementary 1

Since the incidence of injury was assumed to be Poisson distributed the probability distribution associated with a particular injury could be computed. The Poisson probability mass function is:

Where is the mean number of injuries in some time interval andis the probability of *k* events occurring in that time interval. Consider the probability that no injuries occurred as a function of the number of matches, hence and where *n* is the number of matches and is the mean number of injuries in a single match. Therefore

as expected.
